# Supplementary material for: Patterns of Immune Infiltration in Breast Cancer and Their Clinical Implications: A Gene-Expression-Based Retrospective Study
Source: PubMed Central journal article supplement (PMC5154505; doi:10.1371/journal.pmed.1002194), 2016-12-13
Supplement: pmed.1002194.s008.pdf [file pmed.1002194.s008.pdf]

# ER-Negative

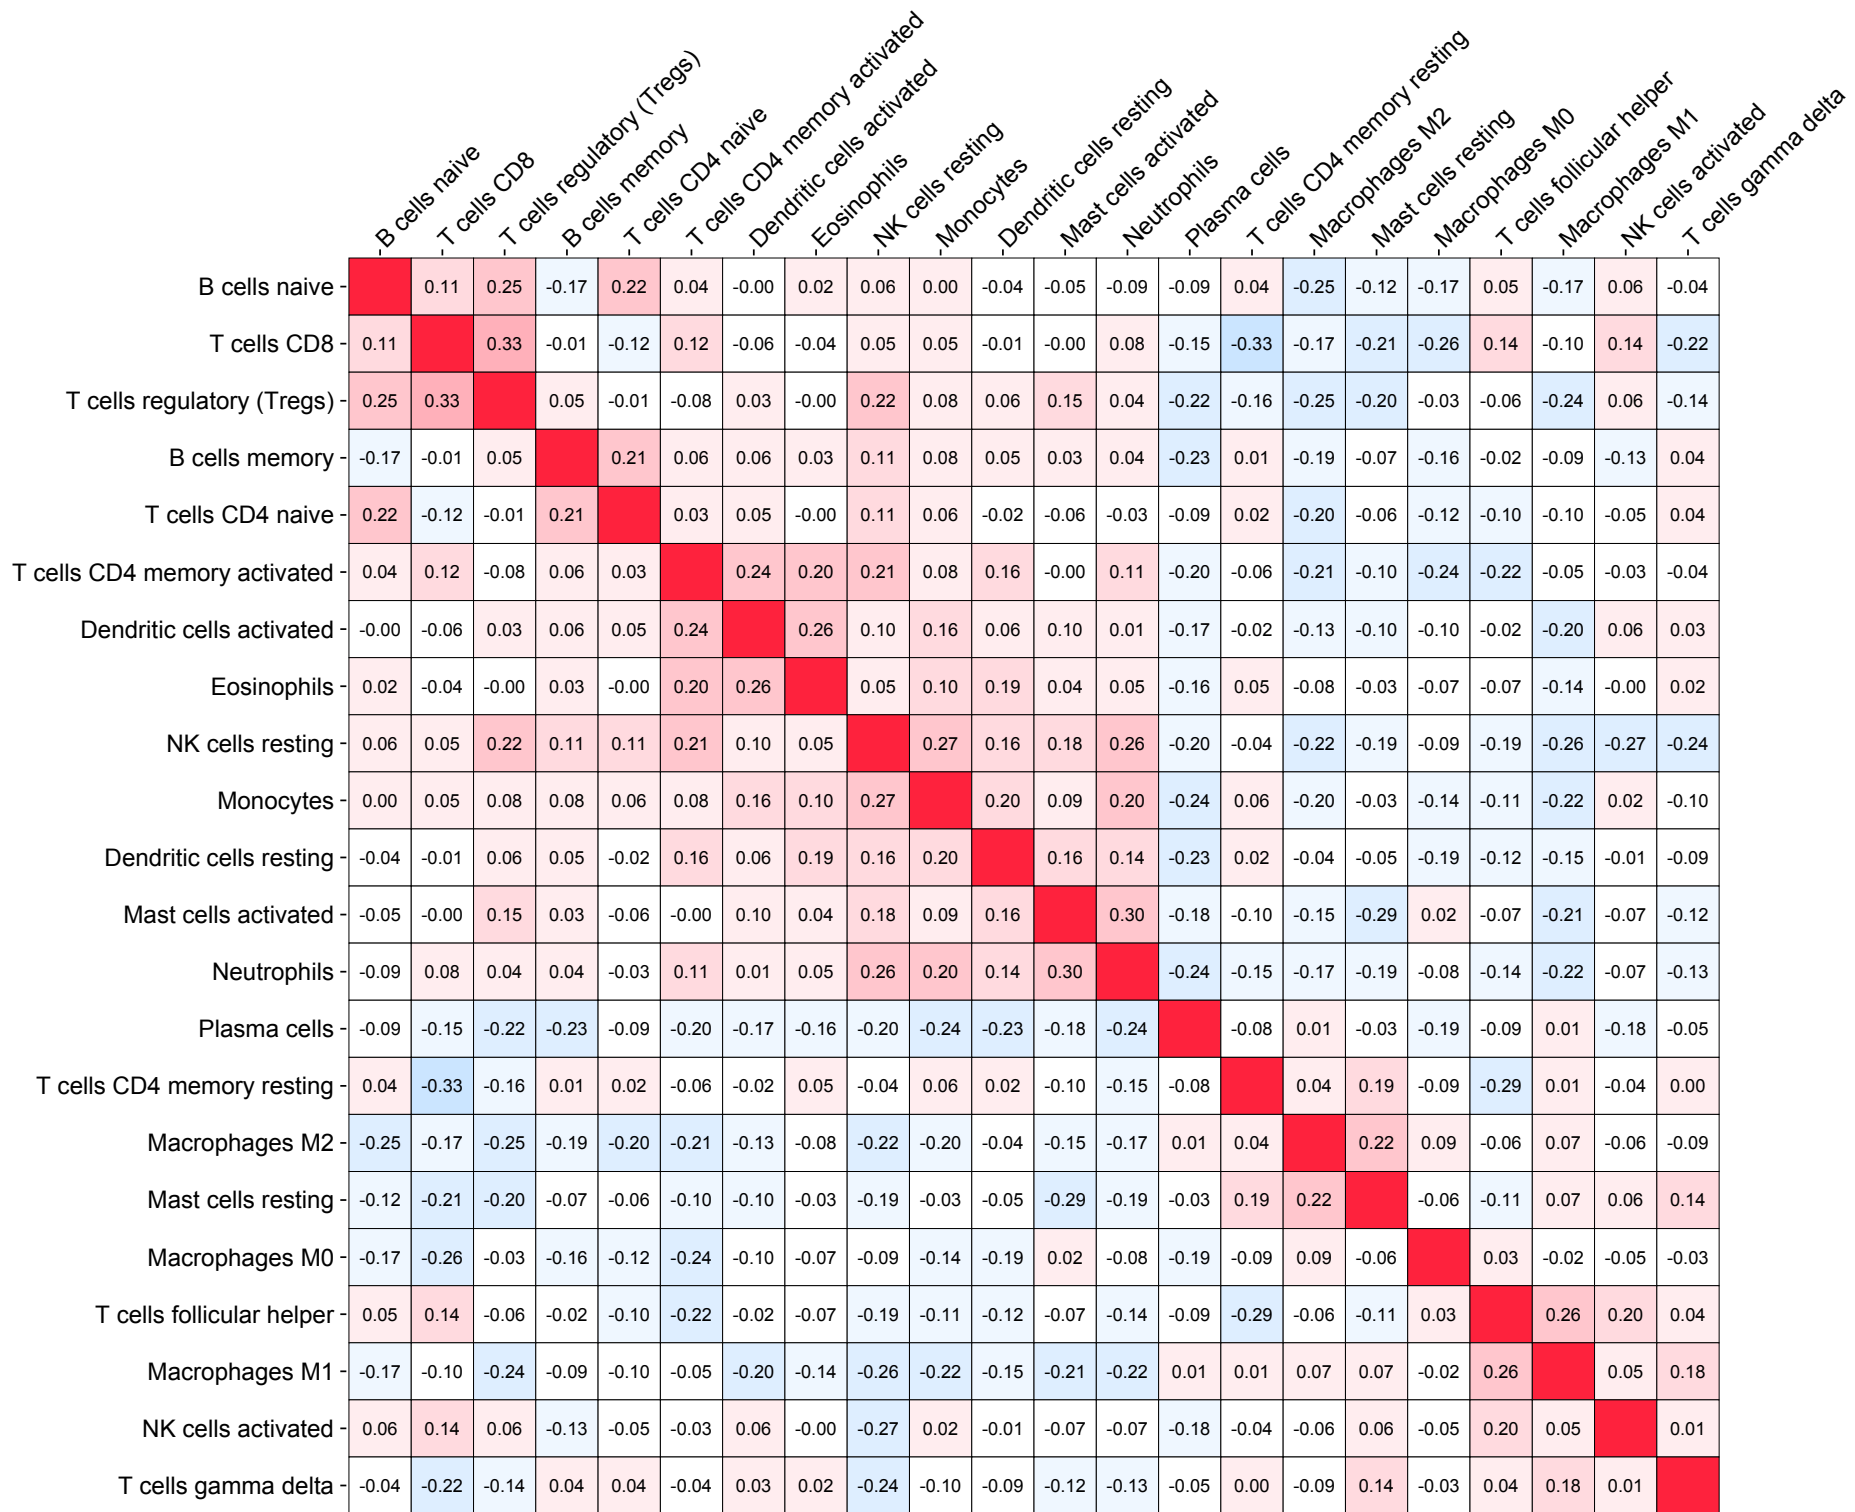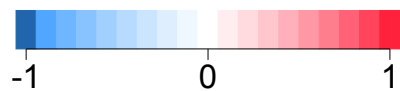

Correlation
