# Supplementary material for: Patterns of Immune Infiltration in Breast Cancer and Their Clinical Implications: A Gene-Expression-Based Retrospective Study
Source: PubMed Central journal article supplement (PMC5154505; doi:10.1371/journal.pmed.1002194), 2016-12-13
Supplement: pmed.1002194.s009.pdf [file pmed.1002194.s009.pdf]

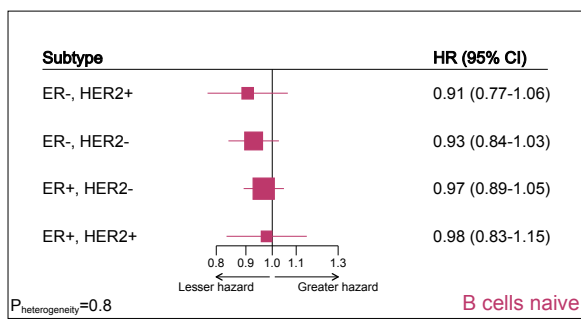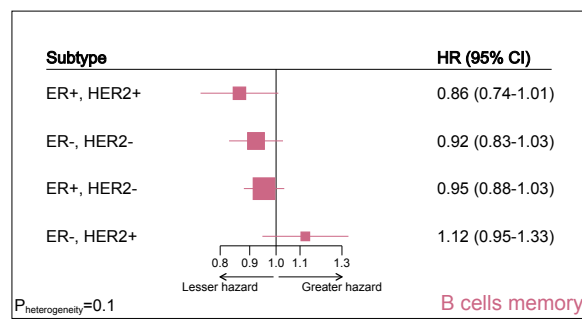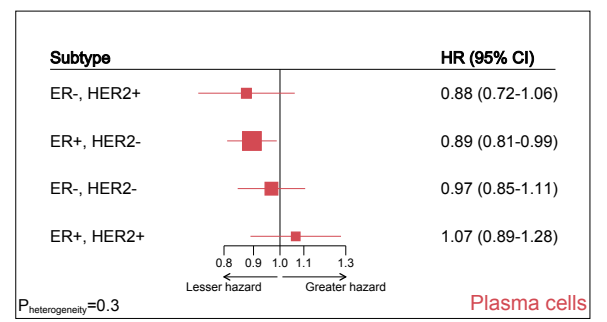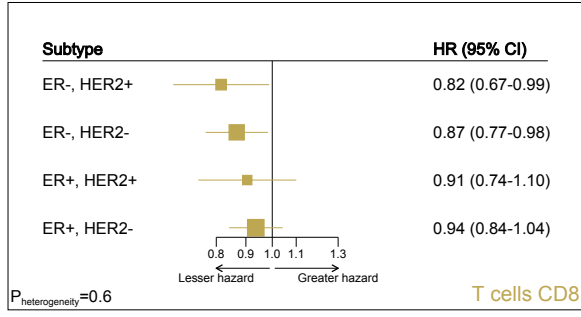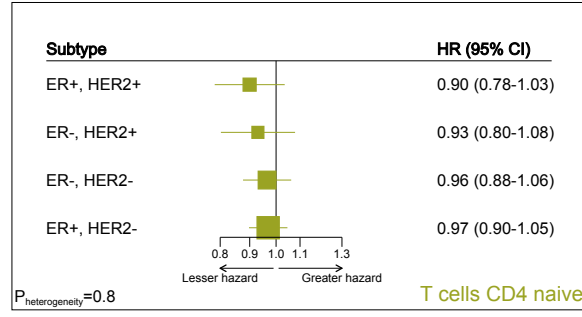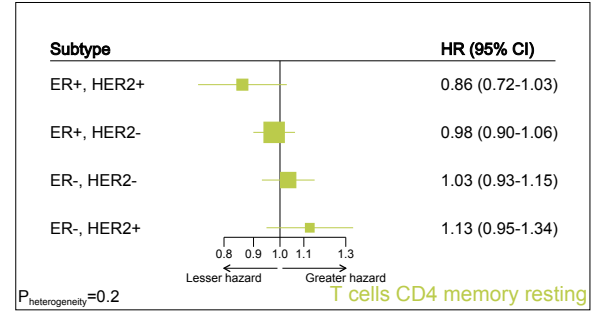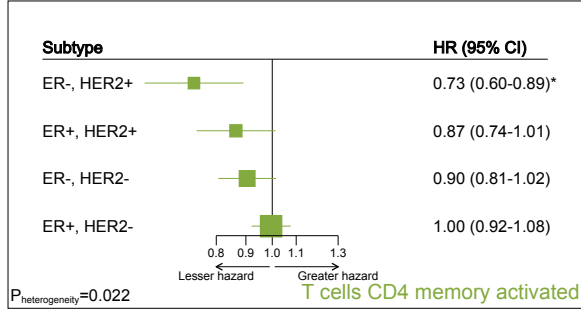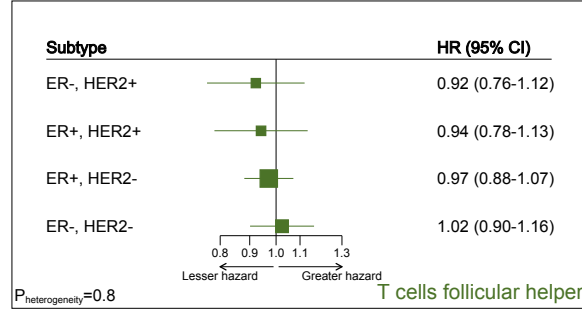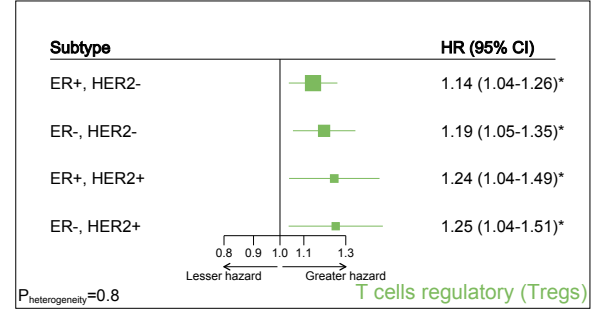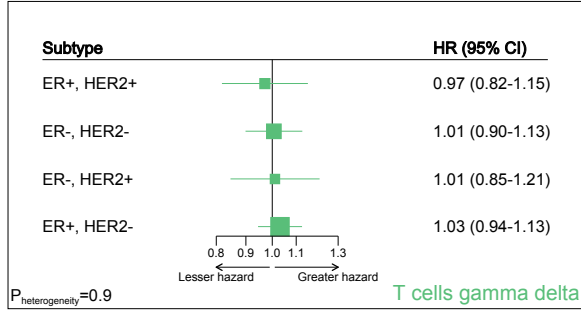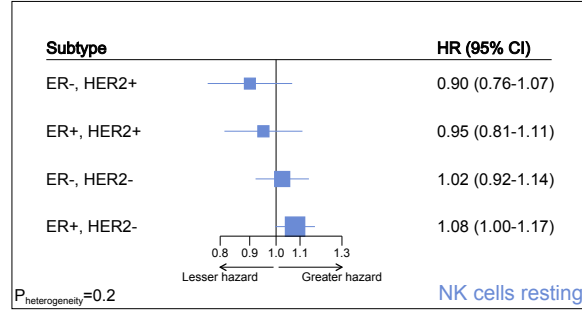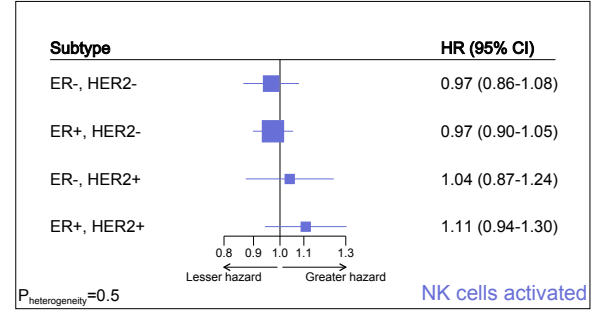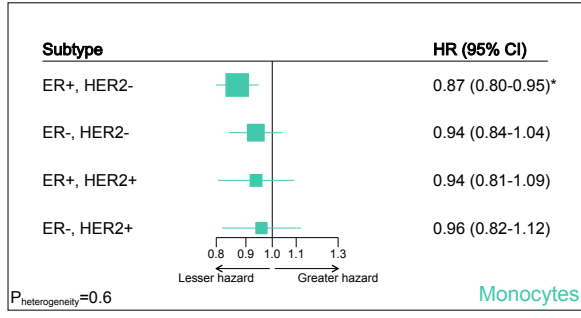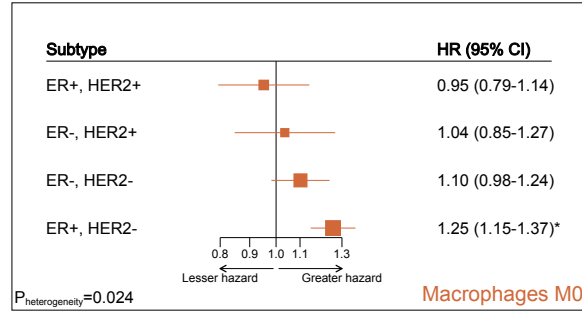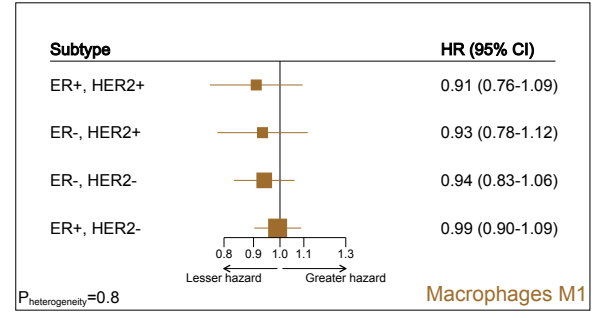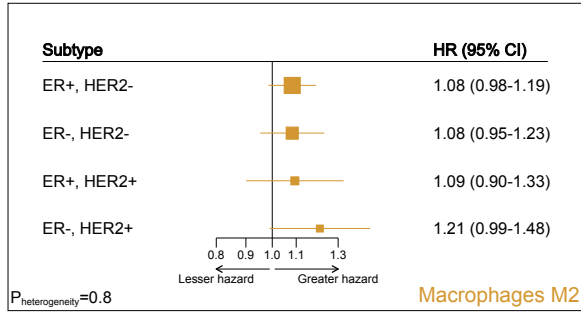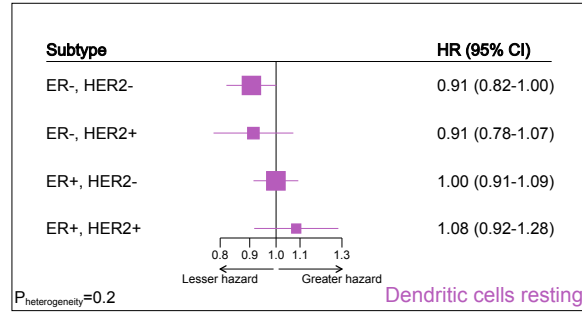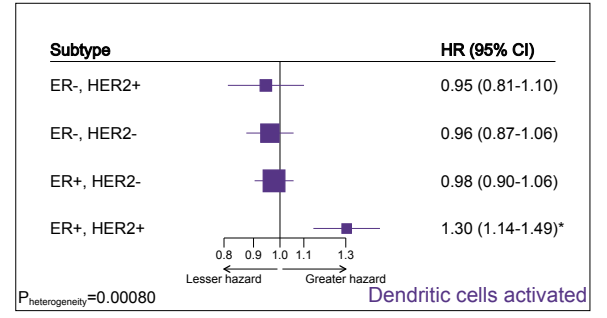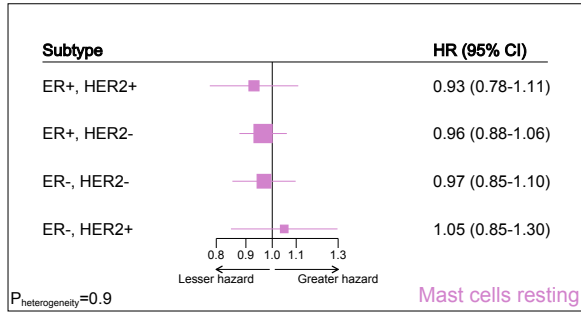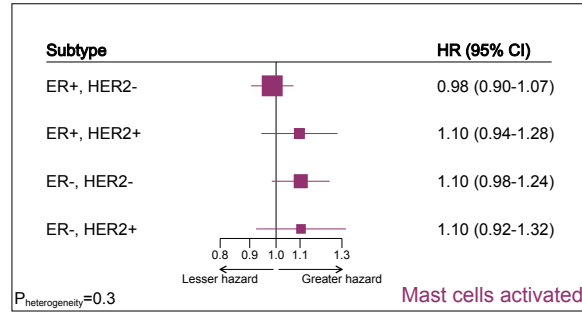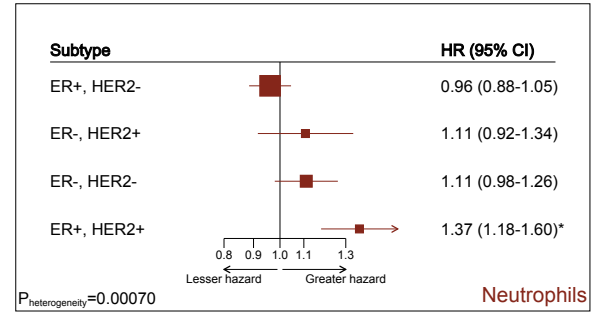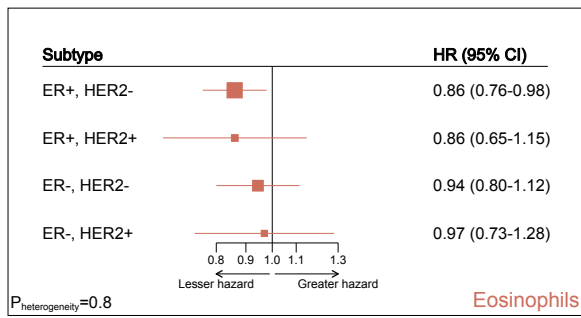

Group (subjects/events)  
 ER-, HER2- (994/302)  
 ER+, HER2- (2072/500)  
 ER-, HER2+ (374/131)  
 ER+, HER2+ (458/141)
