# Supplementary material for: Patterns of Immune Infiltration in Breast Cancer and Their Clinical Implications: A Gene-Expression-Based Retrospective Study
Source: PubMed Central journal article supplement (PMC5154505; doi:10.1371/journal.pmed.1002194), 2016-12-13
Supplement: pmed.1002194.s010.pdf [file pmed.1002194.s010.pdf]

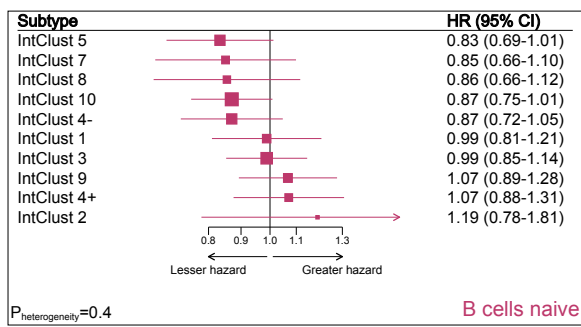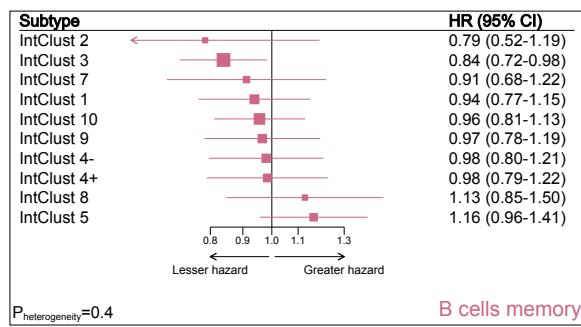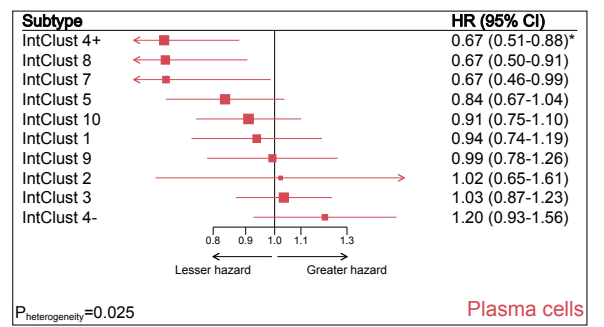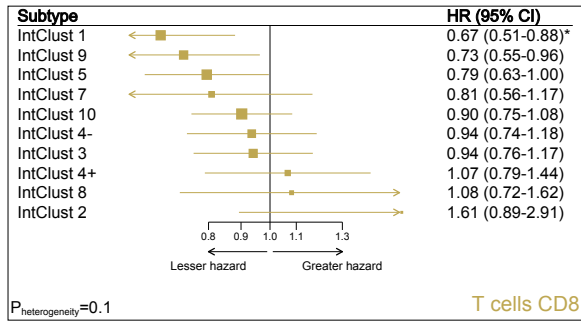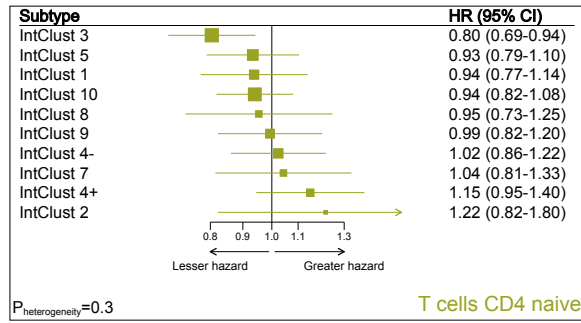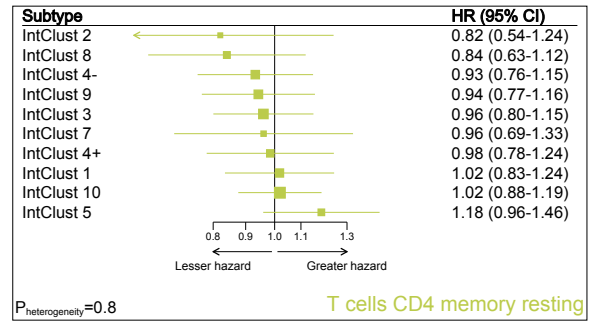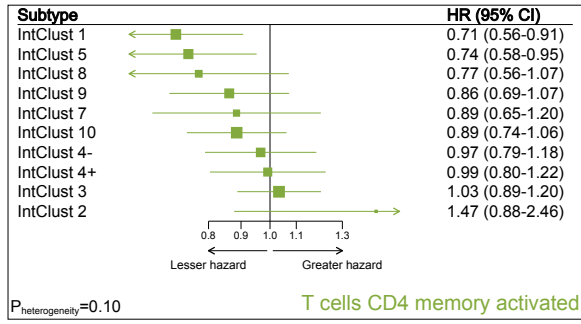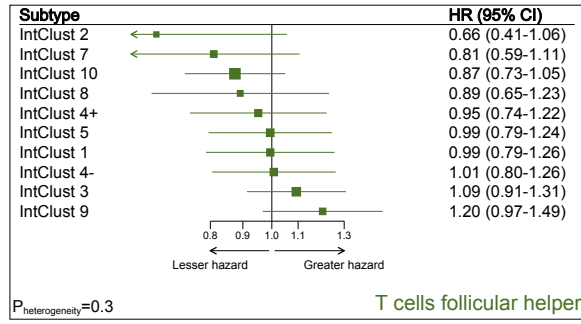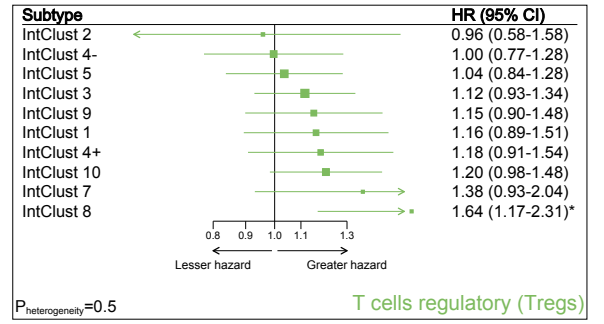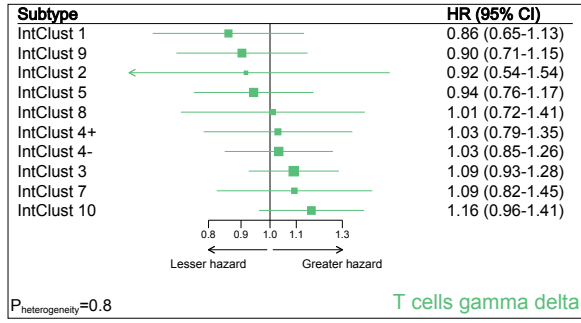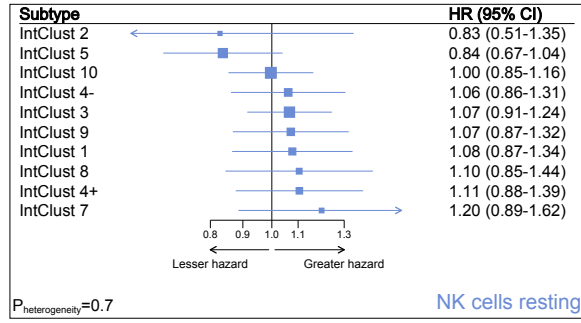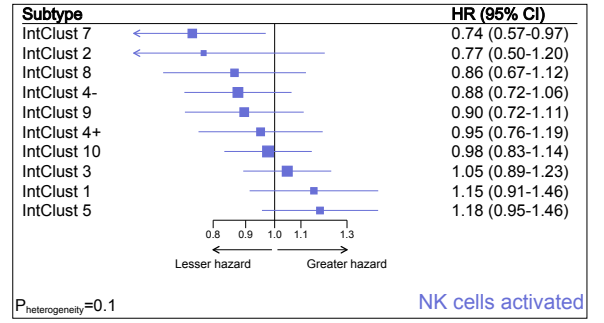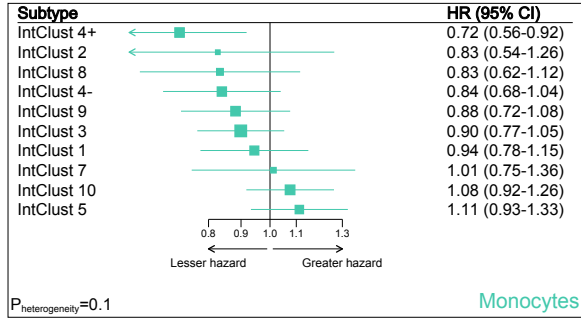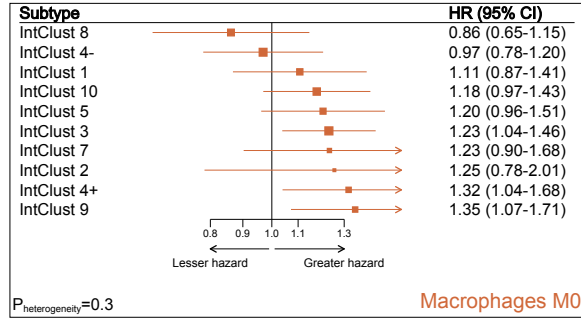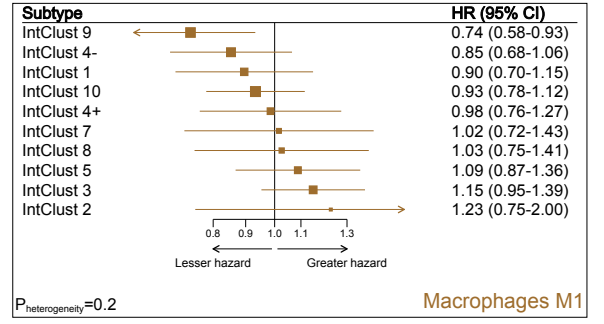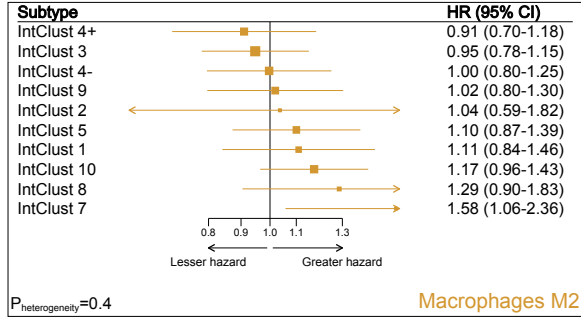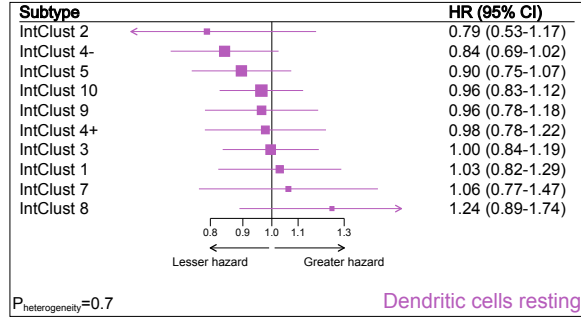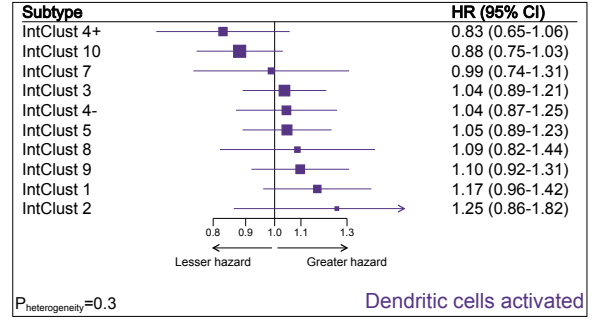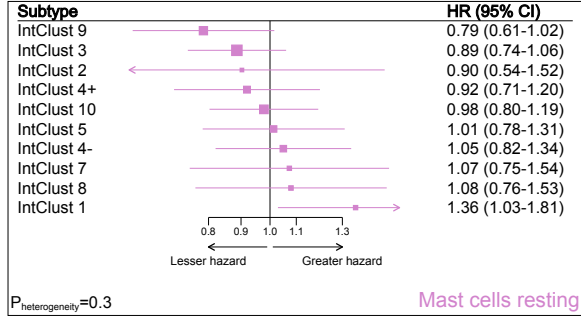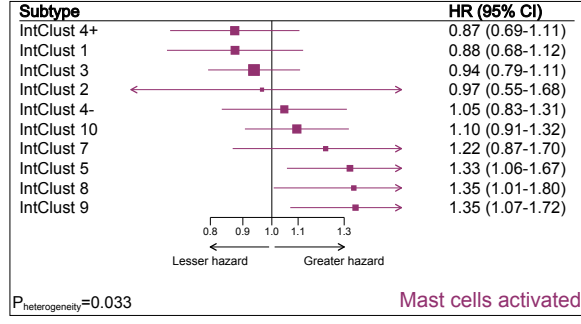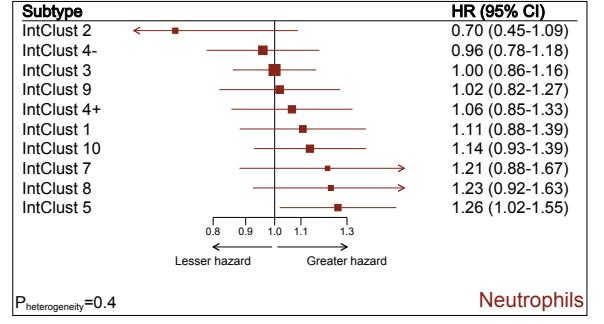

Group (subjects/events)  
 IntClust 1 (256/82)  
 IntClust 3 (586/141)  
 IntClust 4+ (439/77)  
 IntClust 6 (82/22)  
 IntClust 8 (238/51)  
 IntClust 10 (480/137)

IntClust 2 (86/32)  
 IntClust 4- (287/94)  
 IntClust 5 (289/105)  
 IntClust 7 (246/52)  
 IntClust 9 (244/94)
