# Supplementary material for: Patterns of Immune Infiltration in Breast Cancer and Their Clinical Implications: A Gene-Expression-Based Retrospective Study
Source: PubMed Central journal article supplement (PMC5154505; doi:10.1371/journal.pmed.1002194), 2016-12-13
Supplement: pmed.1002194.s012.pdf [file pmed.1002194.s012.pdf]

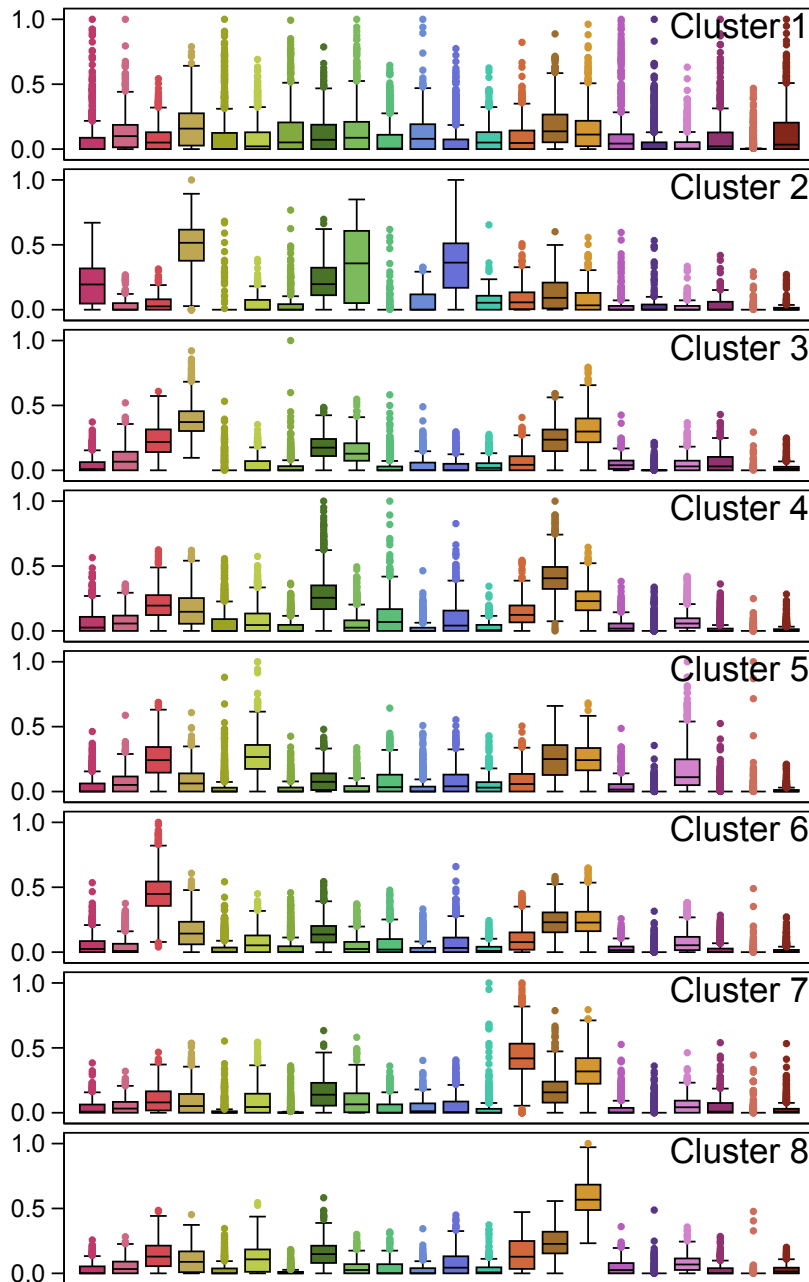

- B cells naive
- B cells memory
- Plasma cells
- T cells CD8
- T cells CD4 naive
- T cells CD4 memory resting
- T cells CD4 memory activated
- T cells follicular helper
- T cells regulatory (Tregs)
- T cells gamma delta
- NK cells resting
- NK cells activated
- Monocytes
- Macrophages M0
- Macrophages M1
- Macrophages M2
- Dendritic cells resting
- Dendritic cells activated
- Mast cells resting
- Mast cells activated
- Eosinophils
- Neutrophils
